# Supplementary material for: A waste to wealth approach through utilization of nano-ceramic tile waste as an accessible and inexpensive solid support to produce a heterogeneous solid acid nanocatalyst: to kill three birds with one stone
Source: Royal Society of Chemistry journal article supplement (doi:10.1039/c6ra11923a), 2016-01-01
Supplement: c6ra11923a1.pdf [file c6ra11923a1.pdf]

# **A waste to wealth approach through utilization of nano-Ceramic Tile Waste as an accessible and inexpensive solid support to produce a heterogeneous solid acid catalyst: To kill three birds with one stone**

Eskandar Kolvari\*, Nadiya Koukabi, Somayeh Zolfagharinia, Malihe. M. Hosseini

Department of Chemistry, Semnan University, Semnan, Iran. E-mail: kolvari@semnan.ac.ir; Fax: +98-23-336-54110; Tel: +98-23-336-54058

## **Table of Contents**

### **-Spectral data of 2-(2,4-dichlorophenyl)-4,5-diphenylimidazole (Table 2, entry 4), (Page 3).**

-Fig. 1. FT-IR spectrum of 2-(2,4-dichlorophenyl)-4,5-diphenylimidazole (Table 2, entry 4), (Page 4).

-Fig. 2. <sup>1</sup>H-NMR spectrum of 2-(2,4-dichlorophenyl)-4,5-diphenylimidazole (Table 2, entry 4), (Page 5).

### **-Spectral data of 2-(3,4-Dimethoxyphenyl)-4,5-diphenyl imidazole (Table 2, entry 16), (Page 6).**

-Fig. 3. FT-IR spectrum of 2-(3,4-Dimethoxyphenyl)-4,5-diphenyl imidazole (Table 2, entry 16), (Page 7).

-Fig. 4. <sup>1</sup>H-NMR spectrum of 2-(3,4-Dimethoxyphenyl)-4,5-diphenyl imidazole (Table 2, entry 16), (Page 8).

### **-Spectral data of 2-(3-Bromophenyl)-4,5-diphenyl-1H-imidazole (Table 2, entry 6), (page 9).**

-Fig. 5. FT-IR spectrum of 2-(3-Bromophenyl)-4,5-diphenyl-1H-imidazole (Table 2, entry 6), (page 10).

-Fig. 6. <sup>1</sup>H-NMR spectrum of 2-(3-Bromophenyl)-4,5-diphenyl-1H-imidazole (Table 2, entry 6), (page 11).

### **-Spectral data of 4-(4,5-diphenyl-1H-imidazol-2-yl)-2-ethoxyphenol (table 2, entry 15), (page 12).**

-Fig. 7. FT-IR spectrum of 4-(4,5-diphenyl-1H-imidazol-2-yl)-2-ethoxyphenol (table 2, entry 15), (page 13).

-Fig. 8. <sup>1</sup>H-NMR spectrum of 4-(4,5-diphenyl-1H-imidazol-2-yl)-2-ethoxyphenol (table 2, entry 15), (page 14).

### **-Spectral data of 2-(2-Methoxyphenyl)-4,5-diphenyl-1H-imidazole (Table 2, entry 10), (Page 15).**

-Fig. 9. FT-IR spectrum of 2-(2-Methoxyphenyl)-4,5-diphenyl-1H-imidazole (Table 2, entry 10), (Page 16).

-Fig. 10. <sup>1</sup>H-NMR spectrum of 2-(2-Methoxyphenyl)-4,5-diphenyl-1H-imidazole (Table 2, entry 10), (Page 17).

### **-Spectral data of 1,2,4,5-tetraphenyl-1H-imidazole (Table 4, entry 1), (Page 18).**

-Fig. 11. FT-IR spectrum of 1,2,4,5-tetraphenyl-1H-imidazole (Table 4, entry 1), (Page 19).

-Fig. 12.  $^1\text{H}$ -NMR spectrum of -Spectral data of 1,2,4,5-tetraphenyl-1*H*-imidazole (Table 4, entry 1), (Page 20).

-Fig. 13.  $^{13}\text{C}$ -NMR spectrum of -Spectral data of 1,2,4,5-tetraphenyl-1*H*-imidazole (Table 4, entry 1), (Page 21).

## Spectral data of some selected compounds

### 2-(2,4-dichlorophenyl)-4,5-diphenylimidazole (Table 2, entry 4)

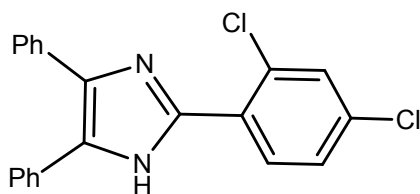

Melting point: 175-177, FT-IR (KBr), v.max (cm<sup>-1</sup>): 3400, 3020, 1597, 1473. <sup>1</sup>H-NMR (500 MHz; DMSO-d<sub>6</sub>): δ<sub>H</sub> (ppm): 12.65 (s, 1H, NH), 7.73 (d, 1H), 7.79 (d, 1H), 7.58–7.22 (m, 11H).

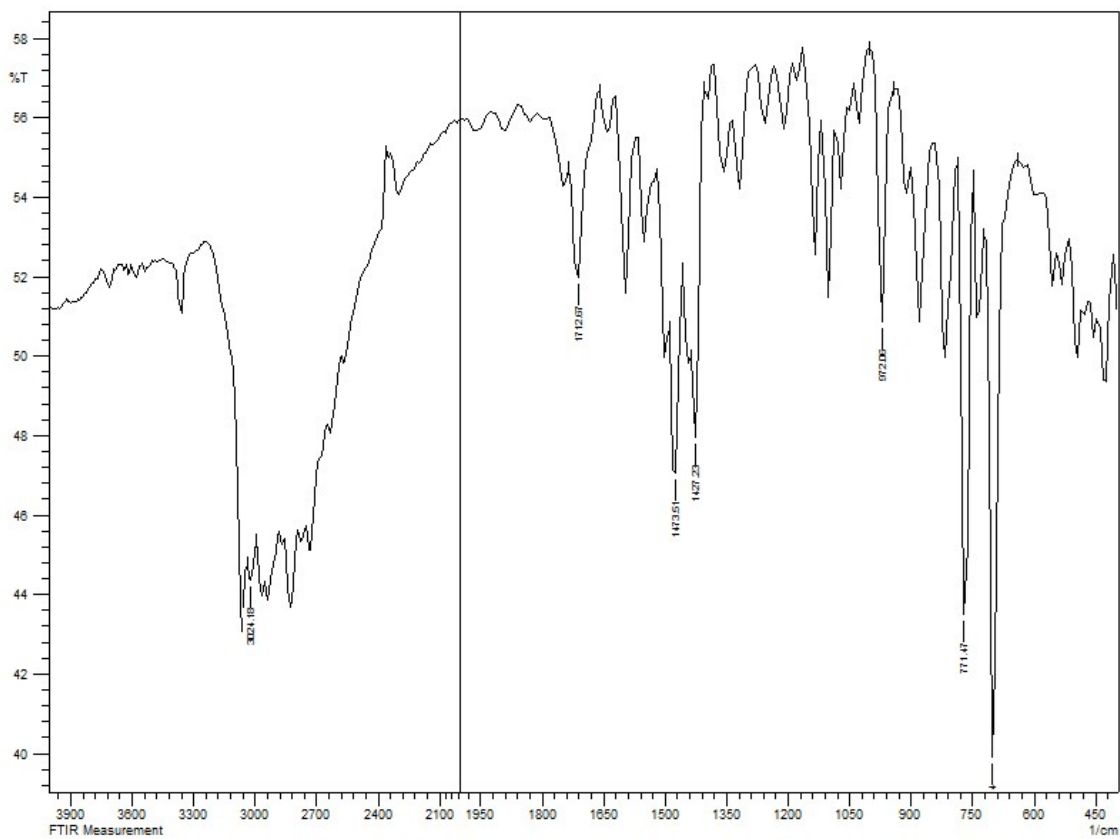

Fig.1. FT-IR (KBr discs) spectrum of 2-(2,4-dichlorophenyl)-4,5-diphenylimidazole (Table 2, entry 4).

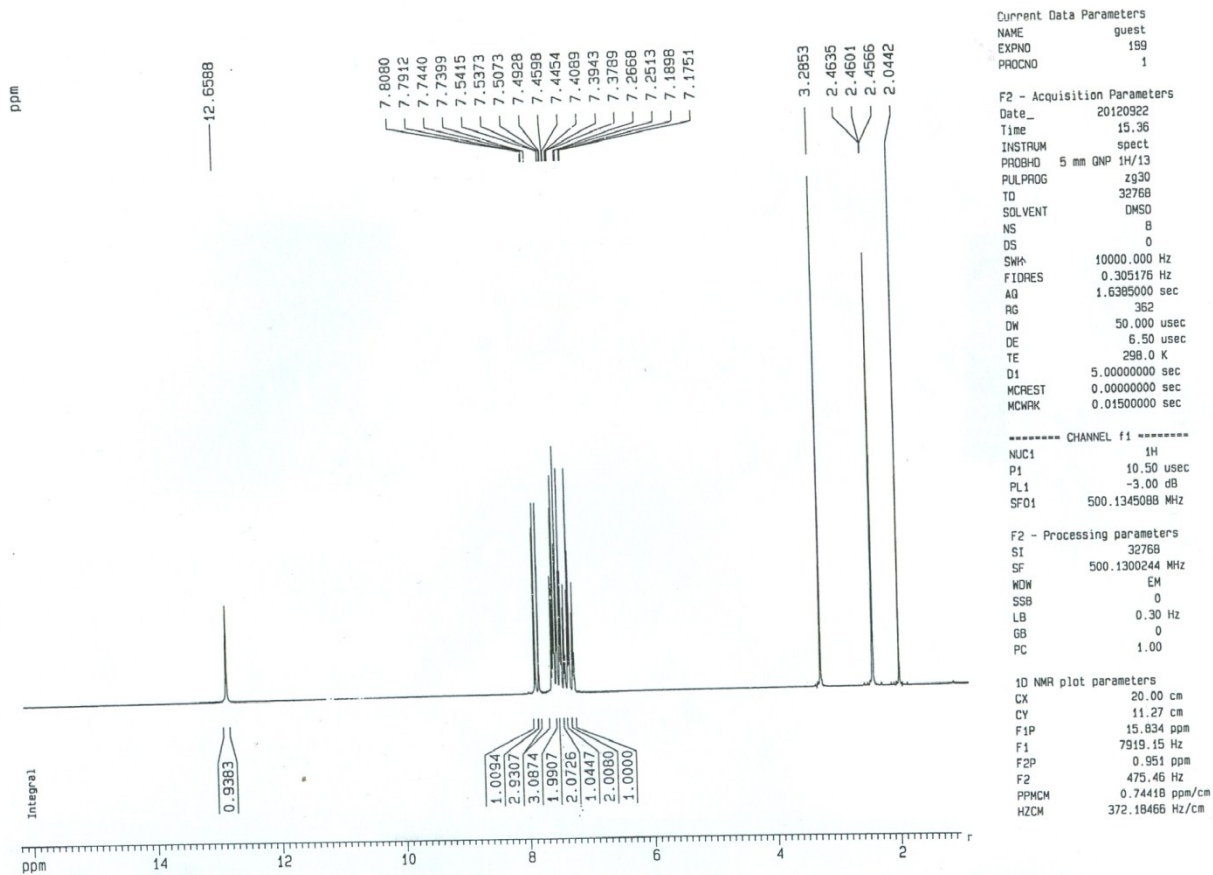

Fig. 2.  $^1\text{H}$ -NMR spectrum of 2-(2,4-dichlorophenyl)-4,5-diphenylimidazole in  $\text{DMSO-d}_6$  (Table 2, entry 4)

**2-(3,4-Dimethoxyphenyl)-4,5-diphenyl imidazole (Table 2, entry 16).**

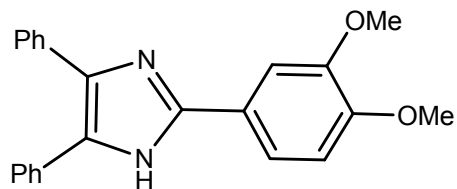

Melting point: 220–223°C, FT-IR (KBr), v.max (cm<sup>-1</sup>): 3422, 3100, 2954, 1504, 1444, 1326, 1026, 763, 702. <sup>1</sup>H-NMR (500 MHz; DMSO-d<sub>6</sub>): δ<sub>H</sub> (ppm): 12.47 (s, 1H, NH), 7.63 (s, 1H), 7.61 (d, 1H), 7.20–7.48 (m, 10H), 7.02 (d, 1H), 3.81 (s, 3H, OCH<sub>3</sub>), 3.77 (s, 3H, OCH<sub>3</sub>).

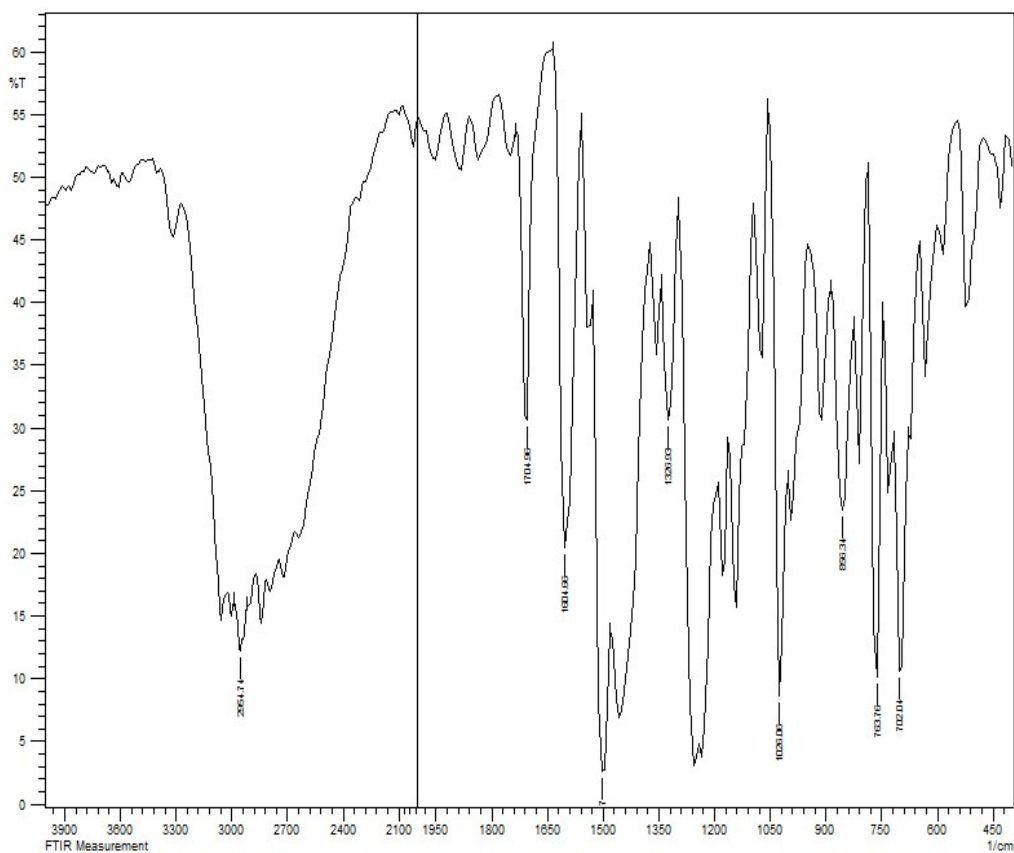

Fig.3. FT-IR (KBr discs) spectrum of 2-(3,4-Dimethoxyphenyl)-4,5-diphenyl imidazole (Table 2, entry 16).

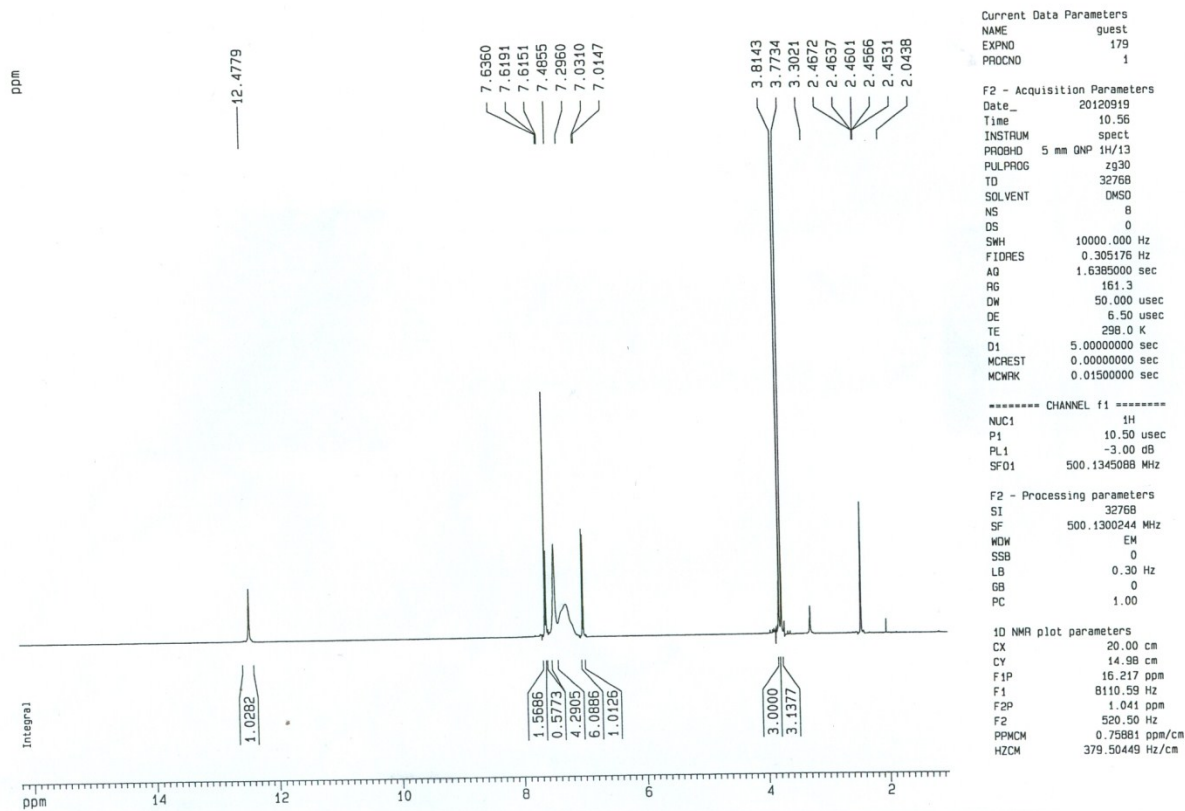

Fig. 4. <sup>1</sup>H-NMR spectrum of 2-(3,4-Dimethoxyphenyl)-4,5-diphenyl imidazole in DMSO-d<sub>6</sub> (Table 2, entry 16).



**2-(3-Bromophenyl)-4,5-diphenyl-1H-imidazole (Table2, entry 6).**

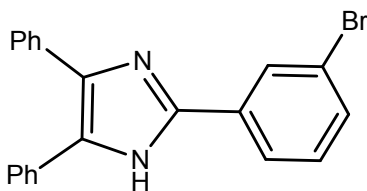

Melting point: 306-309°C, FT-IR (KBr), v.max (cm<sup>-1</sup>): 3400, 3055, 1635, 1573, 1473. <sup>1</sup>H-NMR (500 MHz; DMSO-d<sub>6</sub>): δ<sub>H</sub> (ppm): 12.99 (s, 1H, NH), 8.13 (s, 1H), 8.09 (d, 1H), 7.23–7.59 (m, 12H).

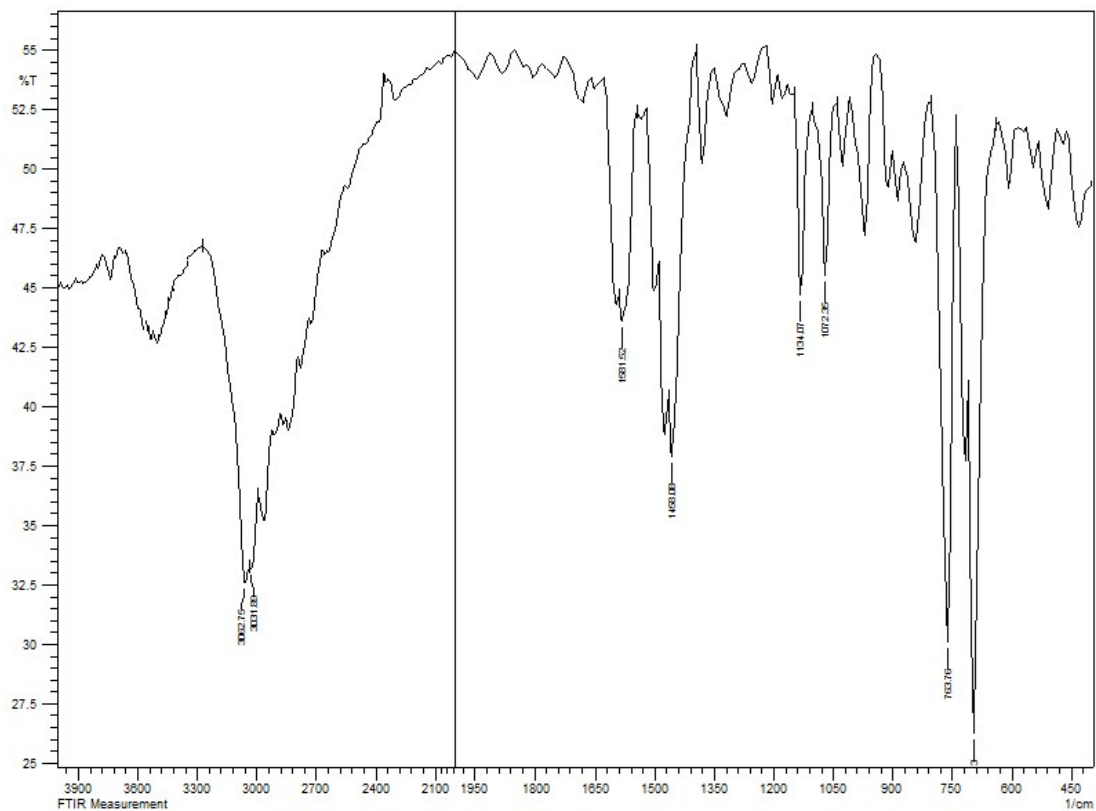

Fig. 5. FT-IR (KBr discs) spectrum of 2-(3-Bromophenyl)-4,5-diphenyl-1H-imidazole (Table2, entry 6).

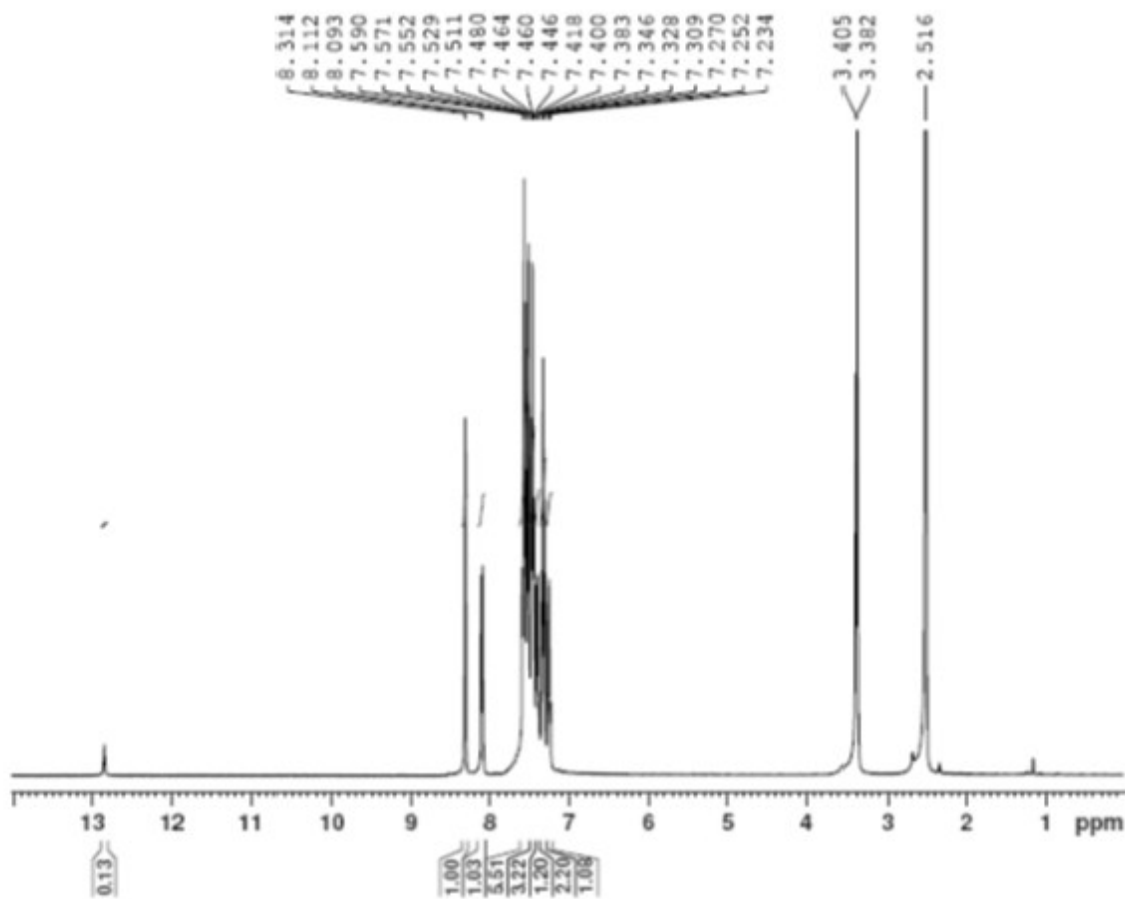

Fig. 6. <sup>1</sup>H-NMR spectrum of 2-(3-Bromophenyl)-4,5-diphenyl-1H-imidazole in DMSO-d<sub>6</sub> (Table2, entry 6).

**4-(4,5-diphenyl-1H-imidazol-2-yl)-2-ethoxyphenol (table 2, entry 15).**

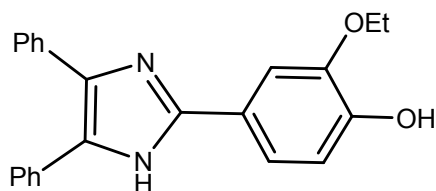

Melting point: 265-267°C, FT-IR (KBr), v.max (cm<sup>-1</sup>): 3560, 3412, 2923, 1604, 1496, 1265.

<sup>1</sup>H-NMR (400 MHz; DMSO-d<sub>6</sub>): δ<sub>H</sub> (ppm): 12.43 (s, 1H, NH), 9.23 (s, 1H, OH), 7.22-7.63 (m, 12H), 6.86 (d, 1H), 4.11 (q, 2H, OCH<sub>2</sub>-CH<sub>3</sub>), 1.394 (t, 3H, OCH<sub>2</sub>-CH<sub>3</sub>).

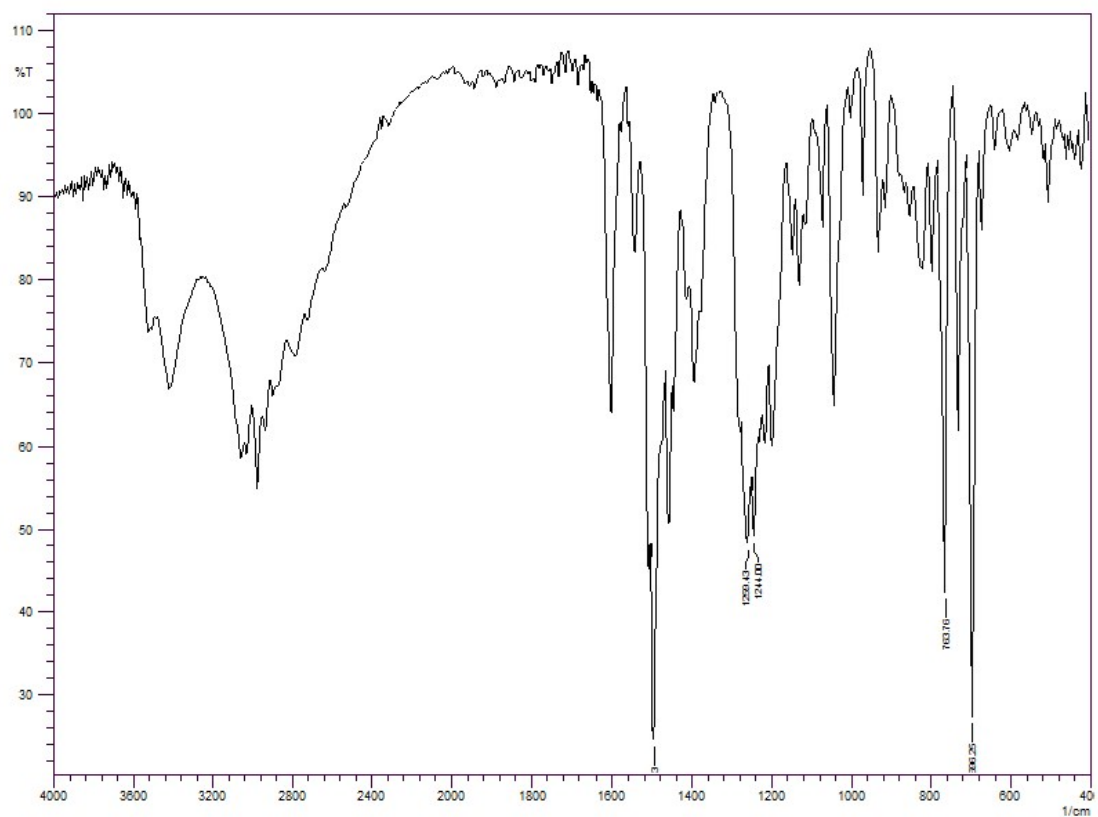

Fig. 7. FT-IR (KBr discs) spectrum of 4-(4,5-diphenyl-1H-imidazol-2-yl)-2-ethoxyphenol (table 2, entry 15).

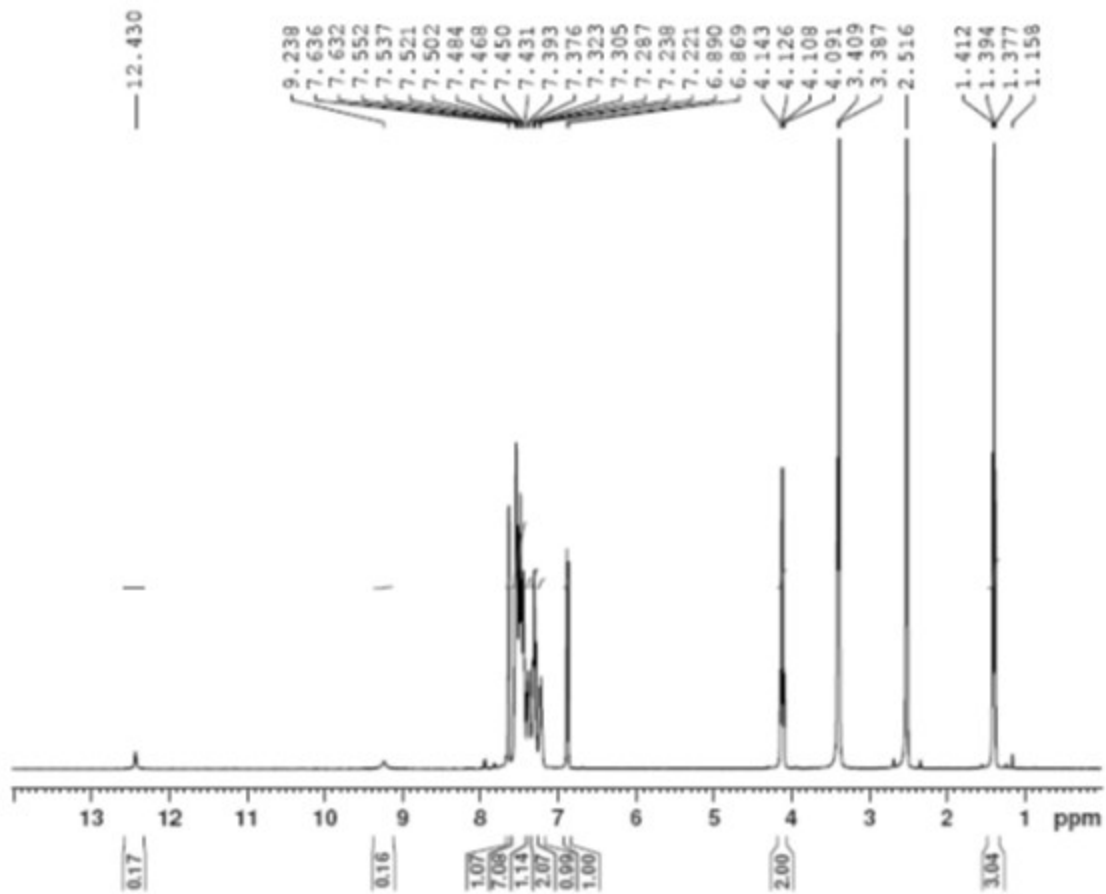

Fig. 8.  $^1\text{H-NMR}$  spectrum of 4-(4,5-diphenyl-1*H*-imidazol-2-yl)-2-ethoxyphenol in  $\text{DMSO-d}_6$  (table 2, entry 15).

**2-(2-Methoxyphenyl)-4,5-diphenyl-1H-imidazole (Table 2, entry 10).**

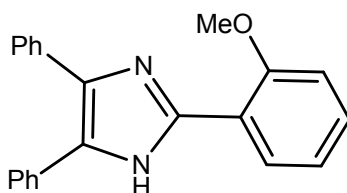

Melting point: 209-211°C, FT-IR (KBr), v.max (cm<sup>-1</sup>): 3400, 3100, 1650, 1615, 1475. <sup>1</sup>H-NMR (500 MHz; DMSO-d<sub>6</sub>): δ<sub>H</sub> (ppm): 11.85, (s, 1H), 8.02 (d, 1H), 6.86–7.47 (m, 13H), 3.30 (s, 3H, OCH<sub>3</sub>).

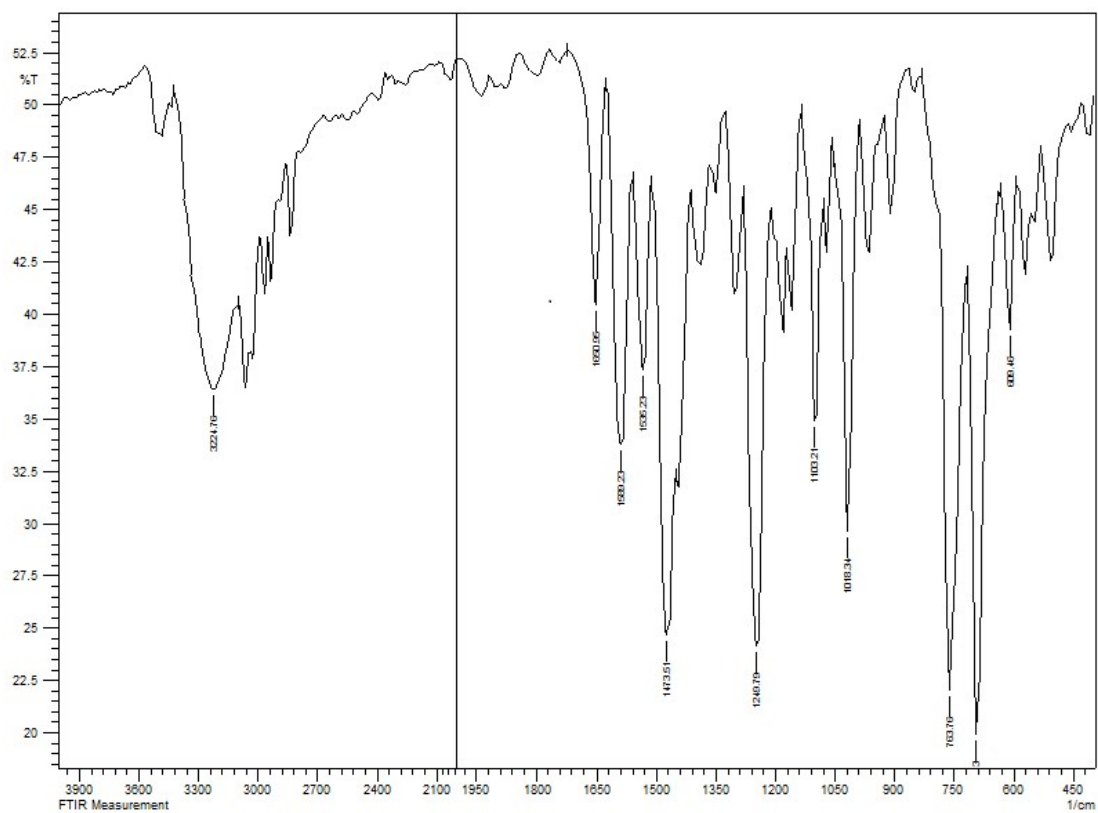

Fig. 9. FT-IR (KBr discs) spectrum of 2-(2-Methoxyphenyl)-4,5-diphenyl-1*H*-imidazole (Table 2, entry 10).



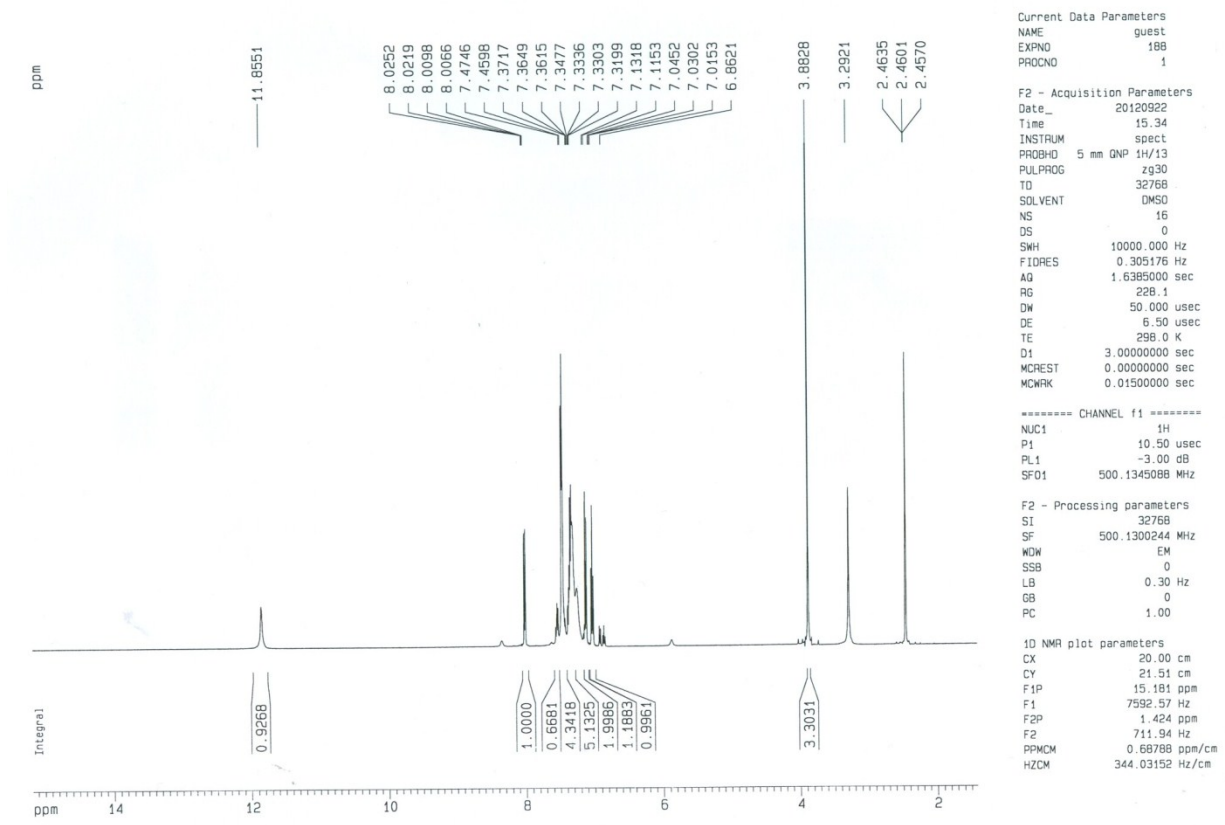

Fig. 10. <sup>1</sup>H-NMR spectrum of 2-(2-Methoxyphenyl)-4,5-diphenyl-1*H*-imidazole in DMSO-*d*<sub>6</sub> (Table 2, entry 10).

**1,2,4,5-tetraphenyl-1*H*-imidazole (Table 4, entry 1).**

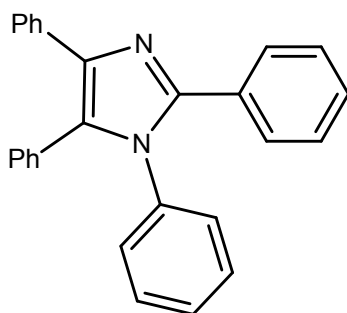

Melting point: 218-219°C, FT-IR (KBr), v.max (cm<sup>-1</sup>): 3058, 1595, 1494, 1440, 694, 914.  
<sup>1</sup>H-NMR (500 MHz; DMSO-d<sub>6</sub>): δ<sub>H</sub> (ppm): 23.7-61.7 (m, 20H). <sup>13</sup>C NMR (500 MHz; DMSO-d<sub>6</sub>): δ<sub>C</sub> (ppm): 136.127-260.138

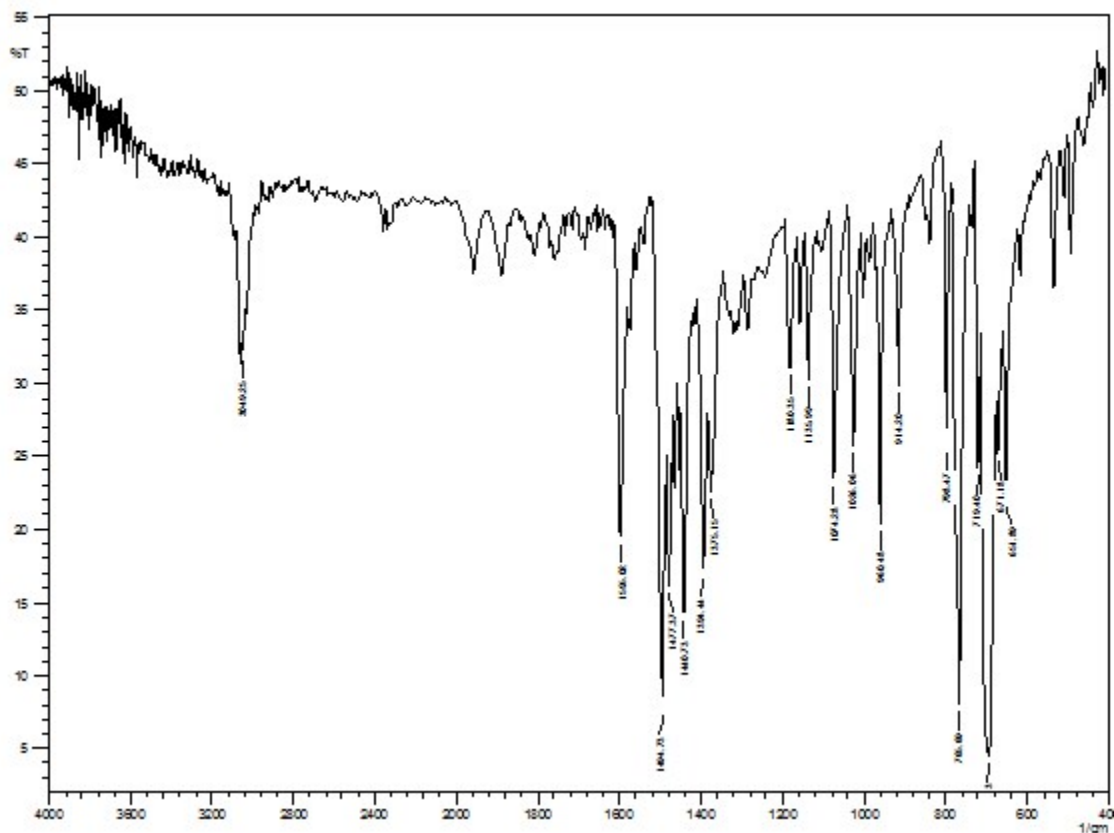

Fig. 11. FT-IR (KBr discs) spectrum of 1,2,4,5-tetraphenyl-1H-imidazole (Table 4, entry 1).

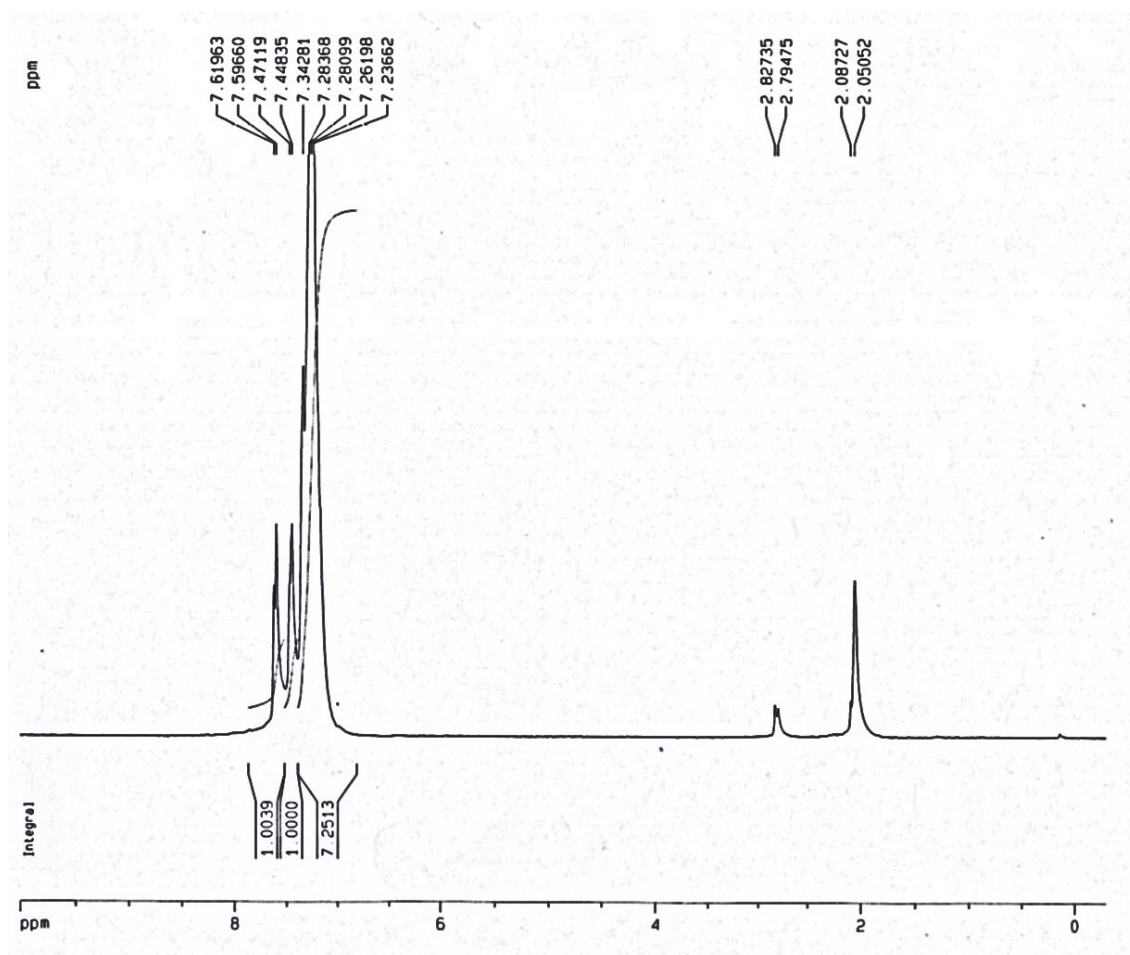

Fig. 12.  $^1\text{H-NMR}$  spectrum of 1,2,4,5-tetraphenyl-1H-imidazole in  $\text{DMSO-d}_6$  (Table 4, entry 1).

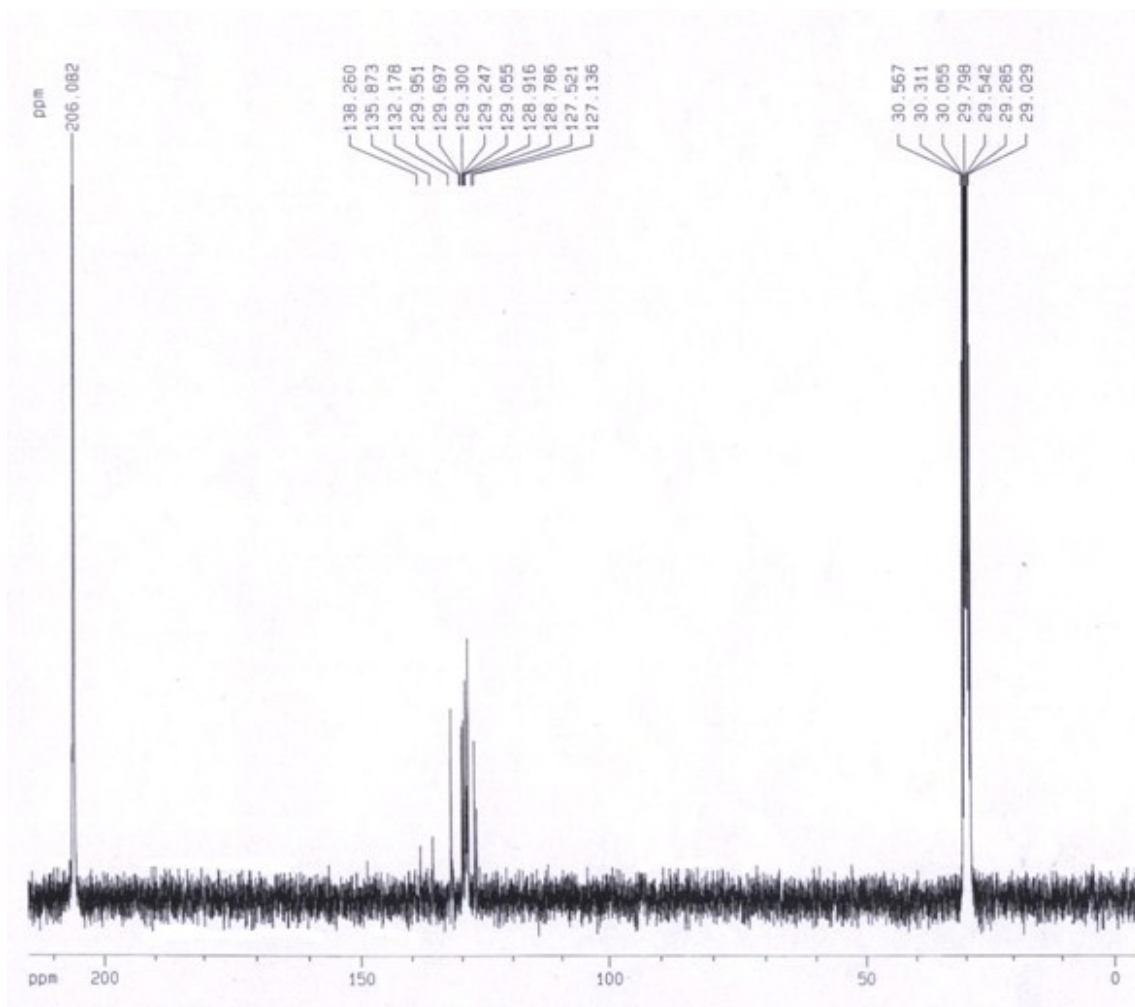

-Fig. 13.  $^{13}\text{C}$ -NMR spectrum of 1,2,4,5-tetraphenyl-1H-imidazole in DMSO- $d_6$  (Table 4, entry 1).
